# Supplementary material for: Novel Silica Hybrid Xerogels Prepared by Co-Condensation of TEOS and ClPhTEOS: A Chemical and Morphological Study
Source: MDPI journal article supplement (doi:10.3390/gels8100677), 2022-10-20
Supplement: s1 [file s1]

## **SUPPLEMENTARY MATERIAL**

### **Novel Silica Hybrid Xerogels Prepared by Co- Condensation of TEOS and ClPhTEOS: A Chemical and Morphological Study**

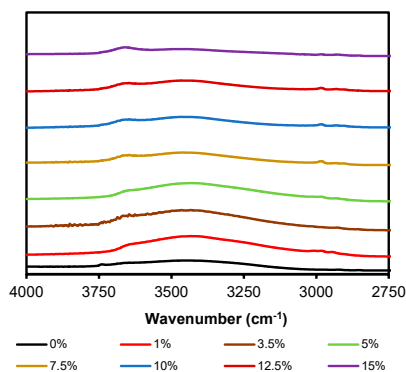

**Figure S1.** FTIR spectra (range 4000-2750  $\text{cm}^{-1}$ ) of the hybrid materials at different molar percentages and the reference (100%TEOS).

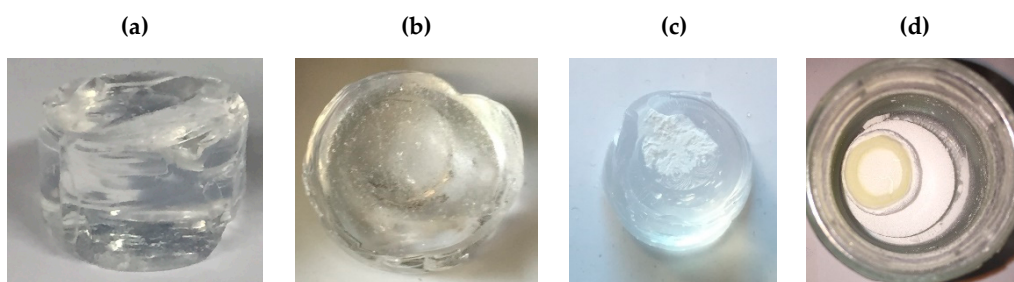

**Figure S2.** Photographs of CIPhTEOS materials: (a) 0CIPh, (b) 15CIPh, (c) 20CIPh, and (d) 100CIPh.

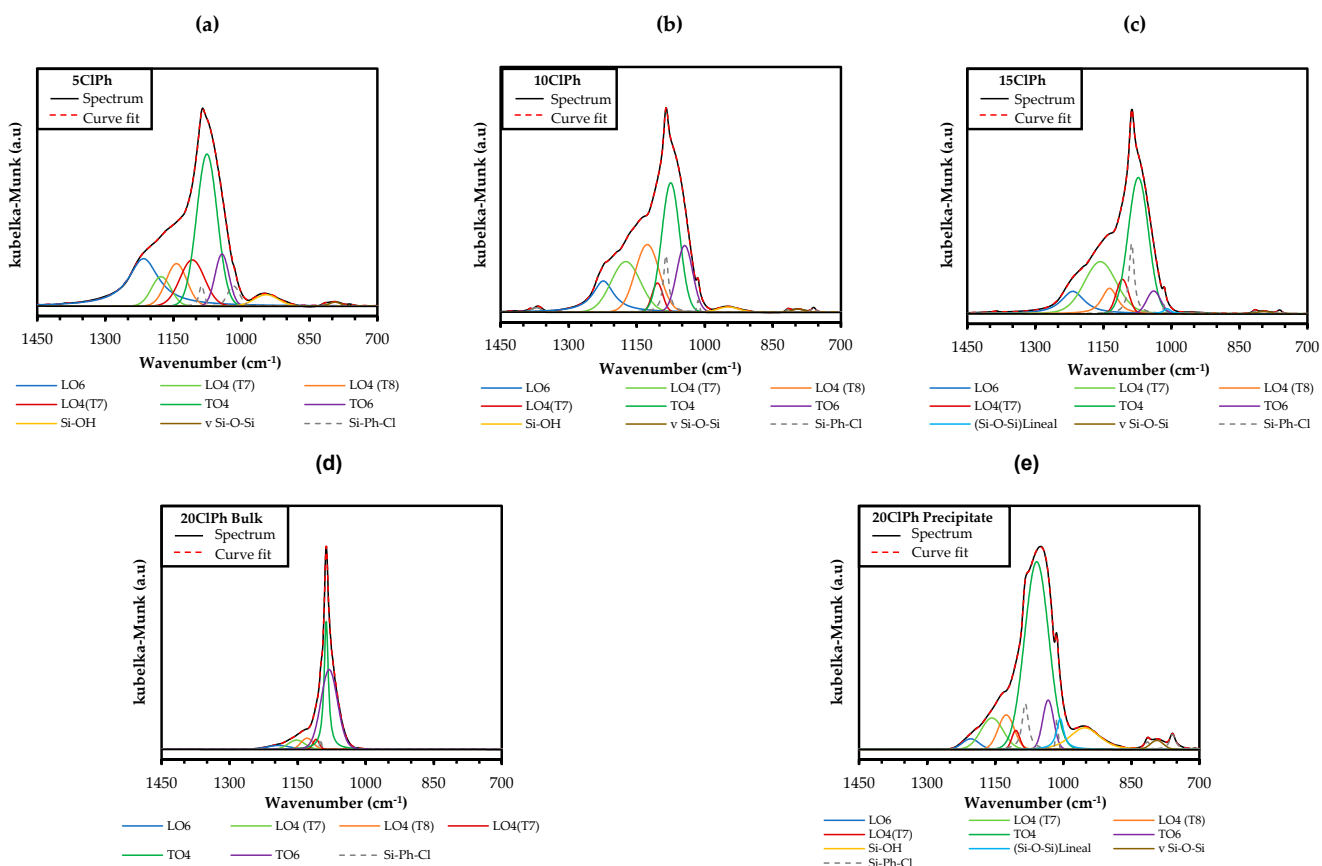

**Figure S3.** Synthetic spectra and Gaussian-Laurentzian bands generated in the curve fitting for: (a) 5CIPh, (b) 10CIPh, (c) 15CIPh, (d) 20CIPh(monolith) and (e) 20CIPh(Precipitate).

**Table S1.** Wavelength and porcentual area of the generated band in the curve fitting for each CIPhTEOS material, and the curve fitting parameters.

| N° of band | 0CIPh            |          | 5CIPh            |          | 10CIPh           |          | 15CIPh           |          | 20CIPh (Monolith) |          | 20CIPh (Precipitate) |          | 100CIPh          |          |
|------------|------------------|----------|------------------|----------|------------------|----------|------------------|----------|-------------------|----------|----------------------|----------|------------------|----------|
|            | cm <sup>-1</sup> | Area (%) | cm <sup>-1</sup>  | Area (%) | cm <sup>-1</sup>     | Area (%) | cm <sup>-1</sup> | Area (%) |
| 1          | a                | -        | -                | -        | 1371             | 0.6      | 1385             | 0.1      | a                 | -        | -                    | -        | 1385             | 0.78     |
| 2          | 1227             | 6.9      | 1216             | 23.3     | 1223             | 11.6     | 1193             | 14.5     | 1192              | 3.3      | 1204                 | 2.1      | 1193             | 0.2      |
| 3          | 1182             | 19.4     | 1177             | 6.1      | 1174             | 17.4     | 1157             | 34.8     | 1153              | 5.9      | 1157                 | 8.2      | 1157             | 32.8     |
| 4          | 1146             | 6.7      | 1143             | 9.5      | 1127             | 19.1     | 1135             | 6.4      | 1129              | 5.1      | 1126                 | 6.4      | 1135             | 7.9      |
| 5          | 1127             | 2.1      | 1108             | 12.1     | 1104             | 3.7      | 1114             | 9.6      | 1110              | 2.4      | 1105                 | 1.8      | 1114             | 2.5      |
| 6          | a                | -        | 1088             | 1.5      | 1085             | 5.1      | 1086             | 10.1     | 1099              | 0.7      | 1084                 | 4.9      | 1086             | 16.4     |
| 7          | 1094             | 17.9     | 1076             | 33.6     | 1075             | 27.3     | 1050             | 39.8     | 1087              | 30.7     | 1059                 | 53.3     | 1050             | 11.3     |
| 8          | 1077             | 46.2     | 1043             | 7.7      | 1044             | 12.5     | 1033             | 12.6     | 1081              | 52.0     | 1033                 | 6.3      | 1033             | 1.3      |
| 9          | a                | -        | 1017             | 2.6      | 1015             | 0.3      | 1015             | 0.4      | a                 | -        | 1014                 | 0.9      | 1015             | 2.0      |
| 10         | a                | -        | a                | -        | 1007             | 0.6      | 1008             | 0.7      | a                 | -        | 1006                 | 3.9      | 1008             | 17.0     |
| 11         | 943              | 0.4      | 945              | 2.9      | 948              | 1.3      | a                | -        | a                 | -        | 953                  | 8.9      | a                | -        |
| 12         | a                | -        | 815              | 0.1      | 816              | 0.1      | 815              | 0.2      | a                 | -        | 815                  | 0.5      | 813              | 1.7      |
| 13         | 802              | 0.3      | 794              | 0.5      | 794              | 0.4      | 796              | 0.6      | a                 | -        | 794                  | 1.4      | 757              | 5.7      |
| 14         | a                | -        | 761              | 0.1      | 760              | 0.2      | 762              | 0.3      | a                 | -        | 759                  | 1.5      | 708              | 0.6      |

  

| Curve fitting parameters |            |            |            |            |          |            |             |
|--------------------------|------------|------------|------------|------------|----------|------------|-------------|
| N° of Iterations         | 116        | 200        | 200        | 200        | 50       | 200        | 38          |
| Residual value           | 0.00520836 | 0.00137787 | 0.00148709 | 0.00167645 | 0.894758 | 0.00043146 | 0.000698583 |

<sup>a</sup>Non generated during the curve fitting

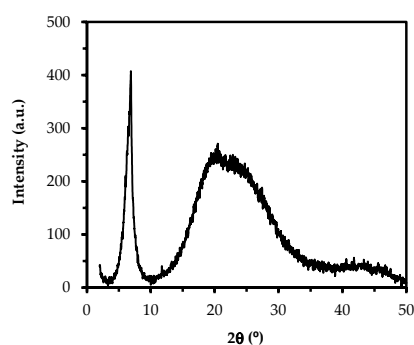

**Figure S4.** XRD spectrum of 100CIPh
